# Supplementary material for: Copolymer films containing amphiphilic side chains of well-defined fluoroalkyl-segment length with biofouling-release potential
Source: Royal Society of Chemistry journal article supplement (doi:10.1039/c6ra15104c), 2016-01-01
Supplement: c6ra15104c1.pdf [file c6ra15104c1.pdf]

## Copolymer films containing amphiphilic side chains of well-defined fluoroalkyl-segment length with biofouling-release potential

Giancarlo Galli,<sup>a</sup> David Barsi,<sup>a</sup> Elisa Martinelli,<sup>\*a</sup> Antonella Glisenti,<sup>b</sup> John A. Finlay,<sup>c</sup> Maureen E. Callow,<sup>c</sup> James A. Callow<sup>c</sup>

<sup>a</sup>*Dipartimento di Chimica e Chimica Industriale and UdR Pisa INSTM, Università di Pisa, 56124 Pisa, Italy, Email: elimart79@dcci.unipi.it* <sup>b</sup>*Dipartimento di Scienze Chimiche, Università di Padova, 35131 Padova, Italy* <sup>c</sup>*School of Biosciences, University of Birmingham, Birmingham B15 2TT, UK*

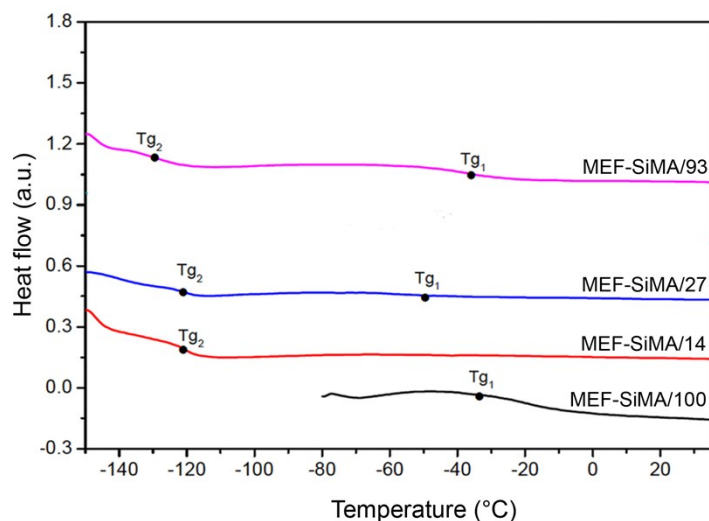

**Fig. S1** DSC curves of MEF-SiMA/100 (black;  $\Delta C_p(T_{g1}) = 0.46 \text{ J (gK)}^{-1}$ ), MEF-SiMA/93 (pink;  $\Delta C_p(T_{g1}) = 0.37 \text{ J (gK)}^{-1}$ ,  $\Delta C_p(T_{g2}) = 0.47 \text{ J (gK)}^{-1}$ ), MEF-SiMA/27 (blue;  $\Delta C_p(T_{g1}) = 0.11 \text{ J (gK)}^{-1}$ ,  $\Delta C_p(T_{g2}) = 0.22 \text{ J (gK)}^{-1}$ ), MEF-SiMA/14 (red;  $\Delta C_p(T_{g2}) = 0.41 \text{ J (gK)}^{-1}$ ).

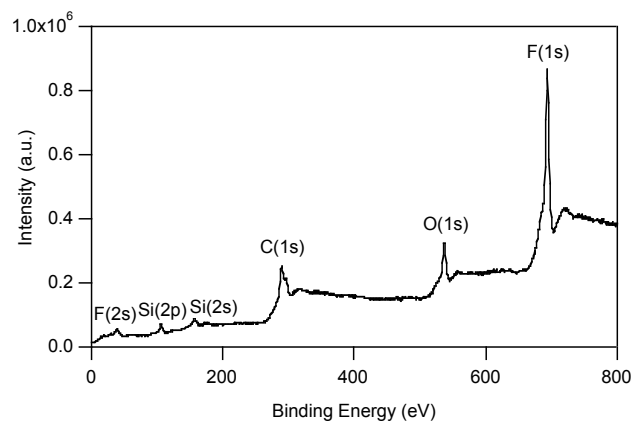

**Fig. S2** XPS survey spectrum of the copolymer film MEF-SiMA/93 ( $\phi = 70^\circ$ ).

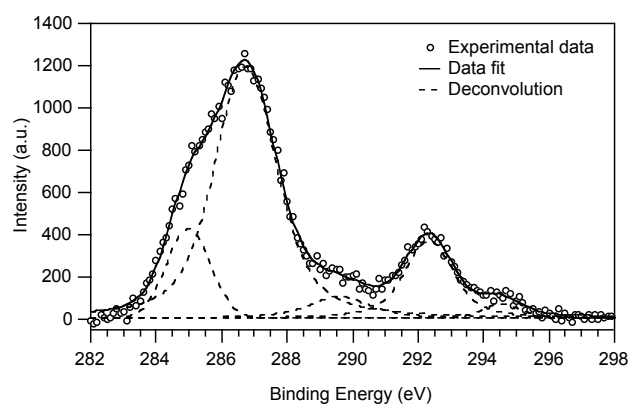

**Fig. S3** Deconvolution of the C(1s) XPS signal of the copolymer film MEF-SiMA/93 ( $\phi = 70^\circ$ ) after being immersed in water for 7 days (see main text for assignments and comments).
